# Supplementary material
Source: publisher site journal article supplement (https://www.dovepress.com/article/419324)
Supplement: Supplementary file 1 [file get_supplementary_file.php]

Appendix 1. Adherence assessment

All patients included in the study were assessed by the same mental health team. In order to diagnose adherence or non-adherence, the following semi-structured interview was used. Each interview was at least one hour, and the same team assessed every patient included.

1. The reason for consultation is the name of the sub-program adherence
2. Current condition: it contains information on two key moments phase II (0-3 months after transplant) and phase III (more than 3 months after transplant)
   1. Phase II
      - When was your transplant?
      - Who was your donor? The response is cadaveric or living. If the patient answers living, include the relationship donor-patient.
      - How was the period after the transplant? ¿Did you have any complications?
      - Who took care of you after the transplant? ¿How did they do it?
      - Where did you have accommodation?
   2. Phase III
      (Adherence assessment)
      - Failure to medical controls or appointment non-compliance: A careful review of the monthly controls in the medical records since their transplant until today (Detail the failures here). If the patients have one or more failures to their medical appointments is considered a failure of medical controls or appointment non-compliant.
      - Procedure non-compliance: Careful review of compliance to the prescribed procedures in the medical records since their transplant until today (Detail the failures here). If the patients have one or more episodes of disobeying medical procedure orders (taking biopsies, hospitalization, laboratory tests) is considered as procedure non-compliant.
      - Medication knowledge:
        - Can you describe a normal day of your medications, including time, doses, and name for each pharmaceutical?
        - In the last month, have you missed a dose of the immunosuppressors?
        - If the previous answer is affirmative, How many doses have you missed, one or more per week, more than 1 in the month, or less than 1 (rarely)?
        - Do you take the immunosuppressors at the appropriate time? Have you ever taken them more than 2 hours after the prescribed time?
        - Have you ever modified your immunosuppression medication without medical indication?
        - If the patients have reported any failures, why have you missed some immunosuppressor doses? Or why have you taken the immunosuppressors after the prescribed time? Or why have you taken the modified immunosuppressors without medical indication?
      - Currently, how is your family? How is your partner (if applicable)? How is the work/study?
3. Complete mental exam. For depressive episodes, an objective scale (Montgomery-Asberg Scale, MADRS) and a subjective scale (Analogue Scale). If the psychiatrist considers other disorders, he uses the respective scales according to the clinical picture and DSM V classification for the diagnoses.
4. Adherence diagnosis: non-adherence if any of the questions asked exhibited non-adherence conduct (medication knowledge, immunosuppression failure, immunosuppressor modification, procedure, and control non-compliance).
5. Non-adherence subtype (if applicable):
   - - Incidental non-adherence
     - Apathetic non- adherence
     - Invulnerable non- adherence
     - Disguised non- adherence
     - Opposition non- adherence
     - Non-specific non- adherence

Appendix 2. Definitions

1. ***Anxiogenic events:***

The evidence suggests that adverse life and health events are associated with anxiety (1). And that anxiety reported by patients is related to morbidity (OR 2.12 CI 1.14-3.96) in patients undergoing major surgery (2). Therefore, in mental health, we consider them important events of phase 2 because they transmit to the patient and his caregiver a perception of poor outcome, a hopeless message about the course of his transplantation, and because they prolong the wait for good news. Therefore, we included this variable and considered its definition as follows:

The clinical or surgical complications that interfere with the normal course of the postoperative period force the patient to be re-hospitalized and/or to undergo treatment that prolongs phase 2. Such as:

- Delayed graft function.
- Urine tract infection or other infection with a requirement of intravenous antibiotic treatment.
- Re-hospitalization for any cause.
- Surgical re-intervention.

Note: Transplant care in Colombiana de trasplantes is divided into three phases:
“Phase I is the pre-transplant evaluation, from the time the patient is studied until the day they are transplanted. Phase II covers the care provided to the patient from the day they are transplanted until the 30th day after surgery. Then comes the extended Phase II, which includes the follow-up and medical care of the patient's second and third months. And phase III includes the patient's follow-up from the third month of transplantation onwards. This phase includes all the services required by the patient for follow-up, such as laboratories, medications, hospitalizations, and surgeries related to the pathology” (3).

1. ***Marital status:***

Marital status is “the civil status of each individual in relation to the marriage laws or customs of the country” (4). In our clinical records, marital status is divided into single, married, free union, widowed, divorced, underage, and other. But in clinical practice, these categories have become increasingly elusive. Today, many stable couples are in common-law unions, and many singles have had long-lasting relationships (or several), better assimilating them into the separate category. We prefer to group them following a more psychological criterion into:

- Single
- Stable marital union (married and free union).
- Dissolved marital union (widowed, divorced, and separated).
- Underage
- Other

1. ***Transplant care:***

Today, almost a third of the patients we monitored in phase 3 were transplanted by other surgical groups. These patients did not receive the strategies for building and strengthening adherence that, on the other hand, the patients transplanted and followed by Colombiana de Trasplantes have experienced. Considering that these strategies (psychoeducational processes in the three phases and permanent monitoring throughout phase 3) have an impact on adherence, we divided the total number of patients into two groups:

- Single center transplant care - Colombiana de Trasplantes group: Those patients who have completed the three phases of the process with us.
- Divided transplant care - Another transplant group: Those patients who were transplanted by another surgical group and come to our control when they are already in phase 3.

1. ***Social support:***

This is the system that guarantees adequate phase 2 care after hospital discharge. However, even if the surgery is successful and without complications, the emotional and physical impact of the transplant surgery usually causes a negative emotional reaction (5–7) that makes the patient less able than usual to take care of the multiple details of his immediate treatment: timely medication, adequate control of ingested and excreted fluids, daily recording of weight and vital signs, attendance to medical appointments, changes in diet, physical exercise, between others (8). Therefore, empowering a trained caregiver to ensure accurate compliance has been our most important Phase 2 strategy. This caregiver is usually a family member who travels with the patient to the transplant center, stays with the patient, and ensures compliance with the mentioned aspects.

The social support was rated in the pre-transplant interview as adequate or inadequate according to these criteria. However, there is often a long period between the pre-transplant evaluation and its performance after surgery, during which the expected support network may become fragile or disappear.

In Phase 2, we rate social support according to these categories:

- Functional: The patient arrives at the hospital accompanied by the person who received training as a caregiver (usually a family member), who shows interest in his well-being and is willing to accompany the patient to the transplant center and remain by his side until the end of Phase 2. The social support assumes the responsibilities indicated (handling medication, keeping daily fluid control, accompanying them to control appointments, and being our interlocutor throughout the process) until the patient has an emotional (and sometimes physical) condition to assume his treatment personally. In addition, that person demonstrates empathy with the patient, patience with their limitations, knowledge of the treatment, responsibility with the control appointments, and compliance with the indications of the team.
- Inadequate: The patient arrives accompanied by a person chosen at the last minute, who did not receive prior training, that is a minor, a person who shows no interest or willingness to assume responsibility for the patient treatment. Throughout the evaluations, instead of being trained and embracing their role, this person behaves like an escort: accompanies the patient but does not participate in the interviews and even shows little empathy with the patient (impatient, affectionately distant, or in clear conflict with the patient).
- Precarious: The patient arrives alone at his surgery and remains alone during phase 2, personally attending to their treatment. Or we are able, with great difficulty, to get someone close to the patient to come to "accompany" them for a while without assuming responsibility for the case.

1. ***Education reinforcement***

It is a process that extends throughout the three phases of transplantation care. However, it has a particularly intense period during phase 2 (immediate and mid-term post-transplant). This phase takes place in one of our transplant centers. The patients remain hospitalized for the first three days under the care of the medical and nursing staff. Then they go to their accommodation (home or shelter) under the observation of a previously trained caregiver, usually a family member.

During the first month post-transplant, the patient must regularly attend a weekly outpatient check-up with transplant surgery and four check-ups with mental health. The first is done during the post-transplant hospitalization, and the second, third and fourth, in the following weeks. The latter ones are performed on an outpatient basis.

On the day of hospital discharge, nursing always conducts a training session for the patient and their caregiver on relevant topics (medication, fluid control, basic care, and daily exercise, among others).

Since much of the success of the transplant depends on adherence to medical recommendations (9,10), the Mental Health team initiates the additional process of psychoeducation. This program schedules the relevant education topics in the sessions of phase 2. This process has three characteristics:

- It is more unhurried: It is carried out at various times during weekly mental health consultations, reviewing and refining the training given by nursing.
- It considers the psychological changes that the patient and caregiver go through. Also, acknowledge the level of post-surgical stress and when some cognitive processes are limited, such as memory, attention, concentration, and comprehension.
- It considers personal and socio-demographic factors that may contribute to or reduce the learning quality (age, rural or indigenous origin, formal education, acquired reading, and writing skills).

Some patients only receive education reinforcement from the nursing team, and others receive it from both nursing and mental health teams. Currently less patients have this education reinforcement only by the nursing team.

1. ***Psychopathology***

A very important number of patients present a depressive episode upon admission to dialysis, which is becoming the most common psychiatric illness in patients with end-stage renal disease (11,12). Considering its duration and intensity is frequently classified as a Major Depressive Episode. The evolution usually corresponds to the natural course of the disease. A percentage of patients evolve towards full recovery, and another portion towards the persistence of residual symptoms.

The first questions are directed to corroborate or rule out the existence of a depressive episode and its duration. Then, we systematically rule out the persistence of a significant depressive condition (potentially negatively influencing adherence). Four strategies are used for this purpose: anamnesis, mental examination, and two scales for evaluating the affective state. An objective scale (Montgomery-Asberg Scale, MADRS) and a subjective scale (Analogue Scale) (13–15).

The same mental examination (and other scales, which are eligible according to the clinical picture) allow inferring or ruling out the existence of other psychopathological diagnoses. The most important ones, because of their impact on behavior both in phase 2 and phase 3, are:

- Cognitive involvement: mental retardation or dementia.
- Personality disorders: especially those belonging to Cluster B of the DSM-5 classification (16)(Histrionic, Psychopathic, Borderline, and Narcissistic), which are usually unstable, unpredictable, emotional, and dramatic.
- Other disorders of chronic course: psychosis (chronic delusions, schizophrenia), bipolar affective illness, recurrent major depressive disorder, and substance abuse.

References:

1. Miloyan B, Joseph Bienvenu O, Brilot B, Eaton WW. Adverse life events and the onset of anxiety disorders. Psychiatry Res. 2018 Jan 1;259:488–92.

2. Kassahun WT, Mehdorn M, Wagner TC, Babel J, Danker H, Gockel I. The effect of preoperative patient-reported anxiety on morbidity and mortality outcomes in patients undergoing major general surgery. Sci Rep. 2022 Dec 1;12(1).

3. Hospital Universitario Mayor Méderi, Colombiana de trasplantes. Trasplante de órganos [Internet]. 2023 [cited 2023 Jan 19]. Available from: https://www.mederi.com.co/servicios/servicios-complementarios/trasplante-de-organos

4. United Nations Studies in Methods. Handbook of Vital Statistics Systems and Methods. Vol. Volume I. New York ; 1991. 1–93 p.

5. Kayler LK. Candidate Comprehension of Key Concepts in Kidney Transplantation. Ann Transplant. 2015;20:124–31.

6. Fukunishi I, Aikawa A, Ohara T, Hasegawa A. Psychiatric problems among recipients of kidney transplants: a 10-year follow-up. Transplant Proc. 2002 Nov;34(7):2766.

7. de Pasquale C, Luisa Pistorio M, Veroux M, Indelicato L, Biffa G, Bennardi N, et al. Psychological and psychopathological aspects of kidney transplantation: A systematic review. Front Psychiatry. 2020;11.

8. Pasquale C de. Psychopathological aspects of kidney transplantation: Efficacy of a multidisciplinary team. World J Transplant. 2014;4(4):267.

9. Denhaerynck K, Dobbels F, Cleemput I, Desmyttere A, Schäfer-Keller P, Schaub S, et al. Prevalence, consequences, and determinants of nonadherence in adult renal transplant patients: A literature review. Vol. 18, Transplant International. 2005. p. 1121–33.

10. Nevins TE, Matas AJ. Medication noncompliance: Another iceberg’s tip. Vol. 77, Transplantation. 2004. p. 776–8.

11. Ma TKW, Li PKT. Depression in dialysis patients. Nephrology. 2016 Aug;21(8):639–46.

12. Kimmel PL, Cukor D, Cohen SD, Peterson RA. Depression in End-Stage Renal Disease Patients: A Critical Review. Adv Chronic Kidney Dis. 2007 Oct;14(4):328–34.

13. Huang Z, Kohler I v., Kämpfen F. A Single-Item Visual Analogue Scale (VAS) Measure for Assessing Depression Among College Students. Community Ment Health J. 2020 Feb 17;56(2):355–67.

14. Kertzman S, Aladjem Z, Milo R, Ben-Nahum Z, Birger M, Grinspan H, et al. The utility of the Visual Analogue Scale for the assessment of depressive mood in cognitively impaired patients. Int J Geriatr Psychiatry. 2004 Aug;19(8):789–96.

15. Montgomery SA, Åsberg M. A New Depression Scale Designed to be Sensitive to Change. British Journal of Psychiatry. 1979 Apr 29;134(4):382–9.

16. American Psychiatric Association. Diagnostic and statistical manual of mental disorders DSM-5-TR. Fifth Edition. Washington DC: American Psychiatric Publishing; 2022. 1–1377 p.

Appendix 3.

Subtype comparison

|  | Invulnerable (N=153) | Apathetic (N=54) | Disguised (N=43) | Incidental (N=24) | Opposition (N=19) | Non-specific (N=24) | Adherent (N=713) | Total (N=1030) | P-value |
| --- | --- | --- | --- | --- | --- | --- | --- | --- | --- |
| **Age in years** |  |  |  |  |  |  |  |  |  |
| Mean (SD) | 43.0 (13.5) | 48.2 (11.7) | 47.0 (22.6) | 44.9 (13.3) | 43.2 (12.1) | 44.4 (15.2) | 47.9 (14.5) | 46.9 (14.7) | 0.0218*a |
| Median [Min, Max] | 43.0 [17.0, 76.0] | 49.0 [21.0, 73.0] | 58.0 [11.0, 79.0] | 48.5 [22.0, 70.0] | 43.0 [21.0, 65.0] | 43.5 [12.0, 73.0] | 48.0 [7.00, 82.0] | 47.0 [7.00, 82.0] |  |
| **Sex**, n(%) |  |  |  |  |  |  |  |  |  |
| Feminine | 43 (28.1%) | 41 (75.9%) | 12 (27.9%) | 7 (29.2%) | 10 (52.6%) | 8 (33.3%) | 306 (42.9%) | 427 (41.5%) | <0.001*b |
| Masculine | 110 (71.9%) | 13 (24.1%) | 31 (72.1%) | 17 (70.8%) | 9 (47.4%) | 16 (66.7%) | 407 (57.1%) | 603 (58.5%) |  |
| **Marital status,** n(%) |  |  |  |  |  |  |  |  |  |
| Single | 59 (38.6%) | 16 (29.6%) | 14 (32.6%) | 12 (50.0%) | 9 (47.4%) | 7 (29.2%) | 202 (28.3%) | 319 (31.0%) | <0.001*b |
| Stable marital union | 73 (47.7%) | 27 (50.0%) | 19 (44.2%) | 9 (37.5%) | 8 (42.1%) | 16 (66.7%) | 429 (60.2%) | 581 (56.4%) |  |
| Dissolved marital union | 8 (5.2%) | 4 (7.4%) | 3 (7.0%) | 2 (8.3%) | 0 (0%) | 0 (0%) | 41 (5.8%) | 58 (5.6%) |  |
| Underage | 1 (0.7%) | 0 (0%) | 7 (16.3%) | 0 (0%) | 0 (0%) | 1 (4.2%) | 8 (1.1%) | 17 (1.7%) |  |
| Other | 12 (7.8%) | 7 (13.0%) | 0 (0%) | 1 (4.2%) | 2 (10.5%) | 0 (0%) | 33 (4.6%) | 55 (5.3%) |  |
| **Time after transplant,** n(%) |  |  |  |  |  |  |  |  |  |
| Between 0 and 12 months | 8 (5.2%) | 3 (5.6%) | 4 (9.3%) | 4 (16.7%) | 1 (5.3%) | 2 (8.3%) | 111 (15.6%) | 133 (12.9%) | <0.001*b |
| Between 13 and 60 months | 47 (30.7%) | 18 (33.3%) | 19 (44.2%) | 14 (58.3%) | 8 (42.1%) | 6 (25.0%) | 308 (43.2%) | 420 (40.8%) |  |
| 61 months or more | 98 (64.1%) | 33 (61.1%) | 20 (46.5%) | 6 (25.0%) | 10 (52.6%) | 16 (66.7%) | 294 (41.2%) | 477 (46.3%) |  |
| **Number of transplants,** n(%) |  |  |  |  |  |  |  |  |  |
| First | 149 (97.4%) | 53 (98.1%) | 42 (97.7%) | 24 (100%) | 19 (100%) | 24 (100%) | 691 (96.9%) | 1002 (97.3%) | 0.933 b |
| Second or more | 4 (2.6%) | 1 (1.9%) | 1 (2.3%) | 0 (0%) | 0 (0%) | 0 (0%) | 22 (3.1%) | 28 (2.7%) |  |
| **Donor type,** n(%) |  |  |  |  |  |  |  |  |  |
| Cadaveric | 102 (66.7%) | 43 (79.6%) | 35 (81.4%) | 20 (83.3%) | 11 (57.9%) | 18 (75.0%) | 483 (67.7%) | 712 (69.1%) | 0.153 b |
| Living | 51 (33.3%) | 11 (20.4%) | 8 (18.6%) | 4 (16.7%) | 8 (42.1%) | 6 (25.0%) | 230 (32.3%) | 318 (30.9%) |  |
| **Anxiogenic events†,** n(%) |  |  |  |  |  |  |  |  |  |
| No | 92 (60.1%) | 33 (61.1%) | 21 (48.8%) | 13 (54.2%) | 7 (36.8%) | 12 (50.0%) | 416 (58.3%) | 594 (57.7%) | 0.514 b |
| Yes | 61 (39.9%) | 21 (38.9%) | 22 (51.2%) | 11 (45.8%) | 12 (63.2%) | 12 (50.0%) | 297 (41.7%) | 436 (42.3%) |  |
| **Social support†,** n(%) |  |  |  |  |  |  |  |  |  |
| Functional | 123 (80.4%) | 44 (81.5%) | 34 (79.1%) | 20 (83.3%) | 15 (78.9%) | 23 (95.8%) | 630 (88.4%) | 889 (86.3%) | 0.363 b |
| Poor | 21 (13.7%) | 7 (13.0%) | 6 (14.0%) | 2 (8.3%) | 3 (15.8%) | 1 (4.2%) | 63 (8.8%) | 103 (10.0%) |  |
| Inadequate | 9 (5.9%) | 3 (5.6%) | 3 (7.0%) | 2 (8.3%) | 1 (5.3%) | 0 (0%) | 20 (2.8%) | 38 (3.7%) |  |
| **Education reinforcement†,** n(%) |  |  |  |  |  |  |  |  |  |
| Nursing | 107 (69.9%) | 38 (70.4%) | 24 (55.8%) | 20 (83.3%) | 11 (57.9%) | 20 (83.3%) | 340 (47.7%) | 560 (54.4%) | <0.001*b |
| Nursing and psychology | 46 (30.1%) | 16 (29.6%) | 19 (44.2%) | 4 (16.7%) | 8 (42.1%) | 4 (16.7%) | 373 (52.3%) | 470 (45.6%) |  |
| **Psychopathology,** n(%) |  |  |  |  |  |  |  |  |  |
| No | 65 (42.5%) | 8 (14.8%) | 7 (16.3%) | 21 (87.5%) | 4 (21.1%) | 18 (75.0%) | 529 (74.2%) | 652 (63.3%) | <0.001*b |
| Yes | 88 (57.5%) | 46 (85.2%) | 36 (83.7%) | 3 (12.5%) | 15 (78.9%) | 6 (25.0%) | 184 (25.8%) | 378 (36.7%) |  |
| **Psychopathological diagnosis,** n(%) |  |  |  |  |  |  |  |  |  |
| Affective Disorder | 13 (8.5%) | 33 (61.1%) | 5 (11.6%) | 0 (0%) | 1 (5.3%) | 2 (8.3%) | 61 (8.6%) | 115 (11.2%) | <0.001*b |
| Personality disorder | 37 (24.2%) | 1 (1.9%) | 1 (2.3%) | 0 (0%) | 11 (57.9%) | 0 (0%) | 20 (2.8%) | 70 (6.8%) |  |
| Adaptive disorder | 3 (2.0%) | 4 (7.4%) | 0 (0%) | 0 (0%) | 1 (5.3%) | 0 (0%) | 35 (4.9%) | 43 (4.2%) |  |
| Intellectual disability and other developmental disorders | 2 (1.3%) | 3 (5.6%) | 13 (30.2%) | 2 (8.3%) | 0 (0%) | 0 (0%) | 12 (1.7%) | 32 (3.1%) |  |
| Dementia and organic disorders | 1 (0.7%) | 0 (0%) | 11 (25.6%) | 0 (0%) | 0 (0%) | 1 (4.2%) | 2 (0.3%) | 15 (1.5%) |  |
| Other | 32 (20.9%) | 5 (9.3%) | 6 (14.0%) | 1 (4.2%) | 2 (10.5%) | 3 (12.5%) | 54 (7.6%) | 103 (10.0%) |  |
| No psychopathological diagnosis | 65 (42.5%) | 8 (14.8%) | 7 (16.3%) | 21 (87.5%) | 4 (21.1%) | 18 (75.0%) | 529 (74.2%) | 652 (63.3%) |  |
| **Adherence,** n(%) |  |  |  |  |  |  |  |  |  |
| Adherent | 0 (0%) | 0 (0%) | 0 (0%) | 0 (0%) | 0 (0%) | 0 (0%) | 713 (100%) | 713 (69.2%) | <0.001*b |
| No adherent | 153 (100%) | 54 (100%) | 43 (100%) | 24 (100%) | 19 (100%) | 24 (100%) | 0 (0%) | 317 (30.8%) |  |

Table S1. Characterization divided by non-adherence subtype. a Comparison by ANOVA. b Comparison by chi-square test *Statistically significant result p<0.05 †First 3 months post-transplant follow-up.

Transplant group sub-analysis

**Descriptive and bivariate analysis by transplant group**

|  | Single-center transplant care by our group  (N=701) | Divided transplant care (N=329) | Total (N=1030) | P-value |
| --- | --- | --- | --- | --- |
| **Age in years, median [IQR]** | 46.0 [35, 58] | 49.0 [39,60] | 47.0 [36,58] | 0.001*a |
| **Sex**, n(%) |  |  |  |  |
| Feminine | 285 (40.7%) | 142 (43.2%) | 427 (41.5%) | 0.488 b |
| Masculine | 416 (59.3%) | 187 (56.8%) | 603 (58.5%) |  |
| **Marital status,** n(%) |  |  |  |  |
| Single | 228 (32.5%) | 91 (27.7%) | 319 (31.0%) | 0.002*b |
| Stable marital union | 394 (56.2%) | 187 (56.8%) | 581 (56.4%) |  |
| Dissolved marital union | 40 (5.7%) | 18 (5.5%) | 58 (5.6%) |  |
| Underage | 14 (2.0%) | 3 (0.9%) | 17 (1.7%) |  |
| Other | 25 (3.6%) | 30 (9.1%) | 55 (5.3%) |  |
| **Time after transplant,** n(%) |  |  |  |  |
| Between 0 and 12 months | 131 (18.7%) | 2 (0.6%) | 133 (12.9%) | <0.001*b |
| Between 13 and 60 months | 346 (49.4%) | 74 (22.5%) | 420 (40.8%) |  |
| 61 months or more | 224 (32.0%) | 253 (76.9%) | 477 (46.3%) |  |
| **Number of transplants,** n(%) |  |  |  |  |
| First | 681 (97.1%) | 321 (97.6%) | 1002 (97.3%) | 0.855b |
| Second or more | 20 (2.9%) | 8 (2.4%) | 28 (2.7%) |  |
| **Donor type,** n(%) |  |  |  |  |
| Cadaveric | 435 (62.1%) | 277 (84.2%) | 712 (69.1%) | <0.001*b |
| Living | 266 (37.9%) | 52 (15.8%) | 318 (30.9%) |  |
| **Anxiogenic events†,** n(%) |  |  |  |  |
| No | 367 (52.4%) | 227 (69.0%) | 594 (57.7%) | <0.001*b |
| Yes | 334 (47.6%) | 102 (31.0%) | 436 (42.3%) |  |
| **Social support†,** n(%) |  |  |  |  |
| Functional | 586 (83.6%) | 303 (92.1%) | 889 (86.3%) | <0.001*b |
| Poor | 86 (12.3%) | 17 (5.2%) | 103 (10.0%) |  |
| Inadequate | 29 (4.1%) | 9 (2.7%) | 38 (3.7%) |  |
| **Education reinforcement†,** n(%) |  |  |  |  |
| Nursing | 233 (33.2%) | 327 (99.4%) | 560 (54.4%) | <0.001*b |
| Nursing and psychology | 468 (66.8%) | 2 (0.6%) | 470 (45.6%) |  |
| **Psychopathology,** n(%) |  |  |  |  |
| No | 454 (64.8%) | 198 (60.2%) | 652 (63.3%) | 0.176*b |
| Yes | 247 (35.2%) | 131 (39.8%) | 378 (36.7%) |  |
| **Psychopathological diagnosis,** n(%) |  |  |  |  |
| Affective Disorder | 72 (10.3%) | 43 (13.1%) | 115 (11.2%) | 0.039*b |
| Personality disorder | 48 (6.8%) | 22 (6.7%) | 70 (6.8%) |  |
| Adaptive disorder | 36 (5.1%) | 7 (2.1%) | 43 (4.2%) |  |
| Intellectual disability and other developmental disorders | 22 (3.1%) | 10 (3.0%) | 32 (3.1%) |  |
| Dementia and organic disorders | 7 (1.0%) | 8 (2.4%) | 15 (1.5%) |  |
| Other | 62 (8.8%) | 41 (12.5%) | 103 (10.0%) |  |
| No psychopathological diagnosis | 454 (64.8%) | 198 (60.2%) | 652 (63.3%) |  |
| **Adherence,** n(%) |  |  |  |  |
| Adherent | 528 (75.3%) | 185 (56.2%) | 713 (69.2%) | <0.001*b |
| No adherent | 173 (24.7%) | 144 (43.8%) | 317 (30.8%) |  |

Table S2. Characterization divided by transplant group. a Comparison by Mann-Withney U test. b Comparison by chi-square test *Statistically significant result p<0.05 †First 3 months post-transplant follow-up.

***Analysis by transplant group: Single-center transplant care - Colombiana de trasplantes***

Descriptive and bivariate analysis

|  | Adherent (N=528) | Non-adherent (N=173) | Total (N=701) | P-value |
| --- | --- | --- | --- | --- |
| **Age in years, median [IQR]** | 47.0 [7.00, 82.0] | 43.0 [11.0, 73.0] | 46.0 [7.00, 82.0] | 0.012*a |
| Sex, n(%) |  |  |  |  |
| Feminine | 227 (43.0%) | 58 (33.5%) | 285 (40.7%) | 0.034*b |
| Masculine | 301 (57.0%) | 115 (66.5%) | 416 (59.3%) |  |
| **Marital status,** n(%) |  |  |  |  |
| Single | 164 (31.1%) | 64 (37.0%) | 228 (32.5%) | 0.018*b |
| Stable marital union | 310 (58.7%) | 84 (48.6%) | 394 (56.2%) |  |
| Dissolved marital union | 30 (5.7%) | 10 (5.8%) | 40 (5.7%) |  |
| Underage | 6 (1.1%) | 8 (4.6%) | 14 (2.0%) |  |
| Other | 18 (3.4%) | 7 (4.0%) | 25 (3.6%) |  |
| **Time after transplant,** n(%) |  |  |  |  |
| Between 0 and 12 months | 109 (20.6%) | 22 (12.7%) | 131 (18.7%) | <0.001*b |
| Between 13 and 60 months | 269 (50.9%) | 77 (44.5%) | 346 (49.4%) |  |
| 61 months or more | 150 (28.4%) | 74 (42.8%) | 224 (32.0%) |  |
| **Number of transplants,** n(%) |  |  |  |  |
| First | 510 (96.6%) | 171 (98.8%) | 681 (97.1%) | 0.199b |
| Second or more | 18 (3.4%) | 2 (1.2%) | 20 (2.9%) |  |
| **Donor type,** n(%) |  |  |  |  |
| Cadaveric | 327 (61.9%) | 108 (62.4%) | 435 (62.1%) | 0.978b |
| Living | 201 (38.1%) | 65 (37.6%) | 266 (37.9%) |  |
| **Anxiogenic events**†, n(%) |  |  |  |  |
| No | 281 (53.2%) | 86 (49.7%) | 367 (52.4%) | 0.475b |
| Yes | 247 (46.8%) | 87 (50.3%) | 334 (47.6%) |  |
| **Social support**†, n(%) |  |  |  |  |
| Functional | 458 (86.7%) | 128 (74.0%) | 586 (83.6%) | <0.001*b |
| Poor | 56 (10.6%) | 30 (17.3%) | 86 (12.3%) |  |
| Inadequate | 14 (2.7%) | 15 (8.7%) | 29 (4.1%) |  |
| **Education reinforcement**†, n(%) |  |  |  |  |
| Nursing | 156 (29.5%) | 77 (44.5%) | 233 (33.2%) | <0.001*b |
| Nursing and psychology | 372 (70.5%) | 96 (55.5%) | 468 (66.8%) |  |
| **Psychopathology,** n(%) |  |  |  |  |
| No | 391 (74.1%) | 63 (36.4%) | 454 (64.8%) | <0.001*b |
| Yes | 137 (25.9%) | 110 (63.6%) | 247 (35.2%) |  |
| **Psychopathological diagnosis,** n(%) |  |  |  |  |
| Affective Disorder | 39 (7.4%) | 33 (19.1%) | 72 (10.3%) | <0.001*b |
| Personality disorder | 18 (3.4%) | 30 (17.3%) | 48 (6.8%) |  |
| Adaptive disorder | 32 (6.1%) | 4 (2.3%) | 36 (5.1%) |  |
| Intellectual disability and other developmental disorders | 11 (2.1%) | 11 (6.4%) | 22 (3.1%) |  |
| Dementia and organic disorders | 2 (0.4%) | 5 (2.9%) | 7 (1.0%) |  |
| Other | 35 (6.6%) | 27 (15.6%) | 62 (8.8%) |  |
| No psychopathological diagnosis | 391 (74.1%) | 63 (36.4%) | 454 (64.8%) |  |

Table S3. Characterization of adherent and non-adherent single center transplant care patients. a Comparison by Mann-Withney U test. b Comparison by chi-square test *Statistically significant result p<0.05 †First 3 months post-transplant follow-up.

Logistic regression

| **Variables** | ***Adjusted OR for non-adherence*** | |
| --- | --- | --- |
| OR (CI 95%) | p-value |
| **Age** (years) | 0.97 (0.96-0.98) | <0.001 ** |
| **Sex** (Reference feminine) |  |  |
| Masculine | 1.97 (1.31-2.99) | 0.001** |
| Number of transplants (Referencefirst) |  |  |
| Second or more | 0.30 (0.04-1.17) | 0.132 |
| Education reinforcement (Reference only nursing) |  |  |
| Nursing and psychology | 0.45 (0.29-0.69) | <0.001 ** |
| Social support (Reference functional) |  |  |
| Poor | 2.14 (1.21-3.74) | 0.007* |
| Inadequate | 4.22 (1.75-10.30) | 0.001** |
| **Psychopathology** (Reference No) |  |  |
| Yes | 4.96 (3.35,7.40) | <0.001 ** |
| **Time after transplant** (Reference between 0 and 12 months) |  |  |
| Between 13 and 60 months | 1.53 (0.87-2.78) | 0.146 |
| 61 months or more | 2.50 (1.37-4.71) | 0.003* |

Table S4. The multivariate model with the results of the factors associated with non-adherence in single-center transplant care patients. *Statistically significant p <0.05 **Very statistically significant p<0.005

|  | R2 Cox and Snell | R2 Nagelkerke | Greater Variance Inflation Factor (VIF) | Hosmer and Lemeshow test |
| --- | --- | --- | --- | --- |
| Logistic regression model for non-adherence | 0.18 | 0.26 | 1.05 | P value 0.587 |

Table S5. Multivariate model for non-adherence in single center transplant care patients’ assessment

***Analysis by transplant group: Divided transplant care – Another transplant group***

Descriptive and bivariate analysis

|  | Adherent (N=185) | Non-adherence (N=144) | Total (N=329) | P-value |
| --- | --- | --- | --- | --- |
| **Age in years,** mean (SD) | 51.1 (13.9) | 46.6 (14.0) | 49.1 (14.1) | 0.004*a |
| Sex, n(%) |  |  |  |  |
| Feminine | 79 (42.7%) | 63 (43.8%) | 142 (43.2%) | 0.937b |
| Masculine | 106 (57.3%) | 81 (56.3%) | 187 (56.8%) |  |
| **Marital status,** n(%) |  |  |  |  |
| Single | 38 (20.5%) | 53 (36.8%) | 91 (27.7%) | 0.012*b |
| Stable marital union | 119 (64.3%) | 68 (47.2%) | 187 (56.8%) |  |
| Dissolved marital union | 11 (5.9%) | 7 (4.9%) | 18 (5.5%) |  |
| Underage | 2 (1.1%) | 1 (0.7%) | 3 (0.9%) |  |
| Other | 15 (8.1%) | 15 (10.4%) | 30 (9.1%) |  |
| **Time after transplant,** n(%) |  |  |  |  |
| Between 0 and 12 months | 2 (1.1%) | 0 (0%) | 2 (0.6%) | 0.371 b |
| Between 13 and 60 months | 39 (21.1%) | 35 (24.3%) | 74 (22.5%) |  |
| 61 months or more | 144 (77.8%) | 109 (75.7%) | 253 (76.9%) |  |
| **Number of transplants,** n(%) |  |  |  |  |
| First | 181 (97.8%) | 140 (97.2%) | 321 (97.6%) | 1 b |
| Second or more | 4 (2.2%) | 4 (2.8%) | 8 (2.4%) |  |
| **Donor type,** n(%) |  |  |  |  |
| Cadaveric | 156 (84.3%) | 121 (84.0%) | 277 (84.2%) | 1 b |
| Living | 29 (15.7%) | 23 (16.0%) | 52 (15.8%) |  |
| **Anxiogenic events**†, n(%) |  |  |  |  |
| No | 135 (73.0%) | 92 (63.9%) | 227 (69.0%) | 0.099 b |
| Yes | 50 (27.0%) | 52 (36.1%) | 102 (31.0%) |  |
| **Social support**†, n(%) |  |  |  |  |
| Functional | 172 (93.0%) | 131 (91.0%) | 303 (92.1%) | 0.368 b |
| Poor | 7 (3.8%) | 10 (6.9%) | 17 (5.2%) |  |
| Inadequate | 6 (3.2%) | 3 (2.1%) | 9 (2.7%) |  |
| **Education reinforcement**†, n(%) |  |  |  |  |
| Nursing | 184 (99.5%) | 143 (99.3%) | 327 (99.4%) | 1 b |
| Nursing and psychology | 1 (0.5%) | 1 (0.7%) | 2 (0.6%) |  |
| **Psychopathology,** n(%) |  |  |  |  |
| No | 138 (74.6%) | 60 (41.7%) | 198 (60.2%) | <0.001*b |
| Yes | 47 (25.4%) | 84 (58.3%) | 131 (39.8%) |  |
| **Psychopathological diagnosis,** n(%) |  |  |  |  |
| Affective Disorder | 22 (11.9%) | 21 (14.6%) | 43 (13.1%) | <0.001*b |
| Personality disorder | 2 (1.1%) | 20 (13.9%) | 22 (6.7%) |  |
| Adaptive disorder | 3 (1.6%) | 4 (2.8%) | 7 (2.1%) |  |
| Intellectual disability and other developmental disorders | 1 (0.5%) | 9 (6.3%) | 10 (3.0%) |  |
| Dementia and organic disorders | 0 (0%) | 8 (5.6%) | 8 (2.4%) |  |
| Other | 19 (10.3%) | 22 (15.3%) | 41 (12.5%) |  |
| No psychopathological diagnosis | 138 (74.6%) | 60 (41.7%) | 198 (60.2%) |  |

Table S5. Characterization of adherent and non-adherent divided transplant care patients. a Comparison by T - Student test. b Comparison by chi-square test *Statistically significant result p<0.05 †First 3 months post-transplant follow-up.

Logistic regression

| **Variables** | ***Adjusted OR for non-adherence*** | |
| --- | --- | --- |
| OR (CI 95%) | p-value |
| **Age** (years) | 0.97 (0.95-0.99) | 0.003 ** |
| **Psychopathology** (Reference No) |  |  |
| Yes | 4.28 (2.67-6.96) | <0.001 ** |

Table S6. The multivariate model with the results of the factors associated with non-adherence in divided transplant care patients. *Statistically significant p <0.05 **Very statistically significant p<0.005

|  | R2 Cox and Snell | R2 Nagelkerke | Greater Variance Inflation Factor (VIF) | Hosmer and Lemeshow test |
| --- | --- | --- | --- | --- |
| Logistic regression model for non-adherence | 0.13 | 0.17 | 1.01 | P value 0.553 |

Table S7. Multivariate model for non-adherence in divided transplant care patients assessment
